# Supplementary material for: Repositioning of antiarrhythmics for prostate cancer treatment: a novel strategy to reprogram cancer-associated fibroblasts towards a tumor-suppressive phenotype
Source: PubMed Central journal article supplement (PMC11165820; doi:10.1186/s13046-024-03081-0), 2024-06-11
Supplement: 13046_2024_3081_MOESM2_ESM.pdf [file 13046_2024_3081_MOESM2_ESM.pdf]

**a**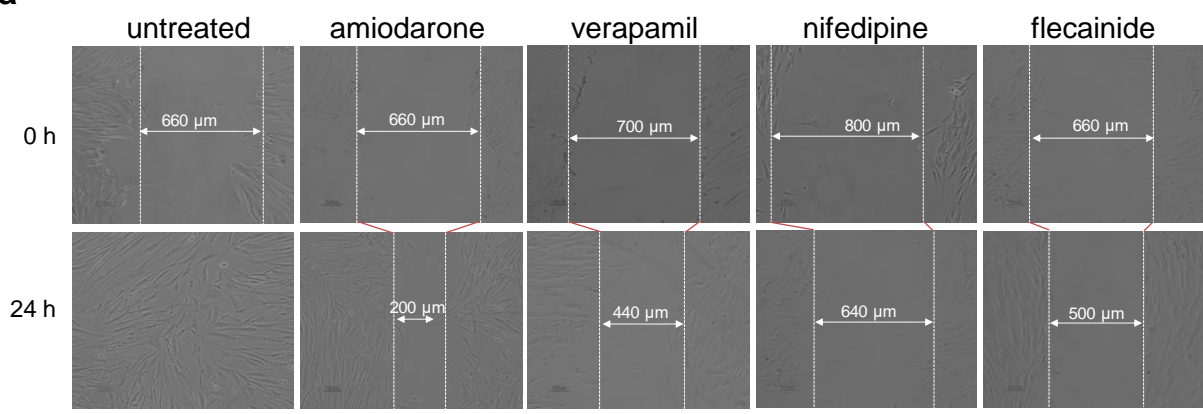**b**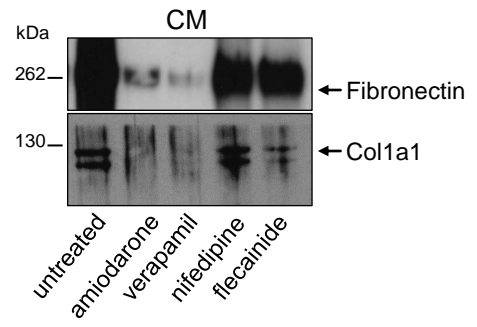**Additional Figure 2**
