# Supplementary material for: Repositioning of antiarrhythmics for prostate cancer treatment: a novel strategy to reprogram cancer-associated fibroblasts towards a tumor-suppressive phenotype
Source: PubMed Central journal article supplement (PMC11165820; doi:10.1186/s13046-024-03081-0), 2024-06-11

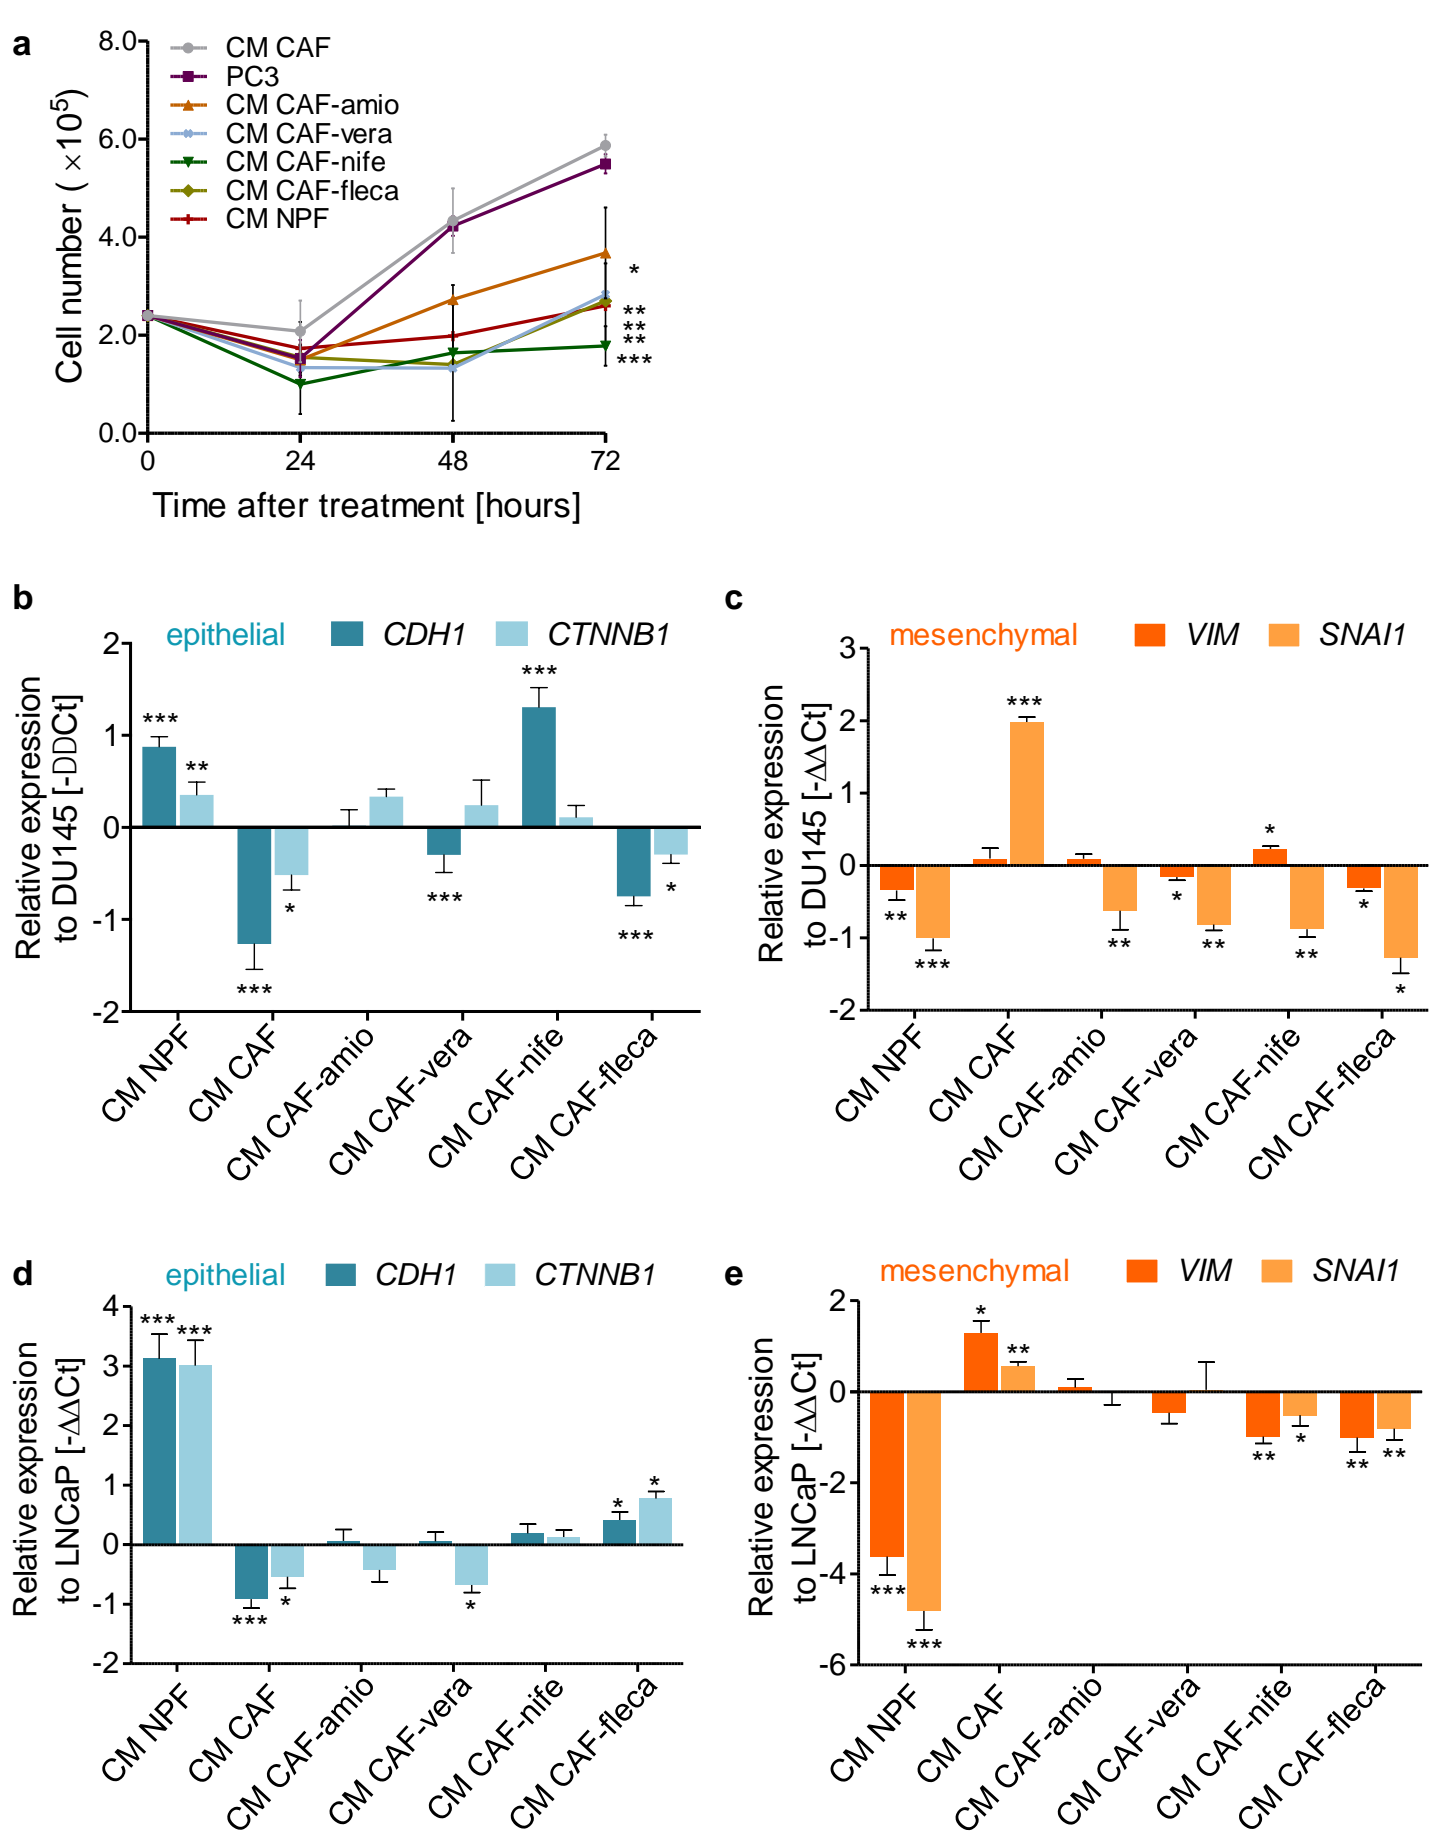

Supplement: 13046_2024_3081_MOESM3_ESM.pdf [file 13046_2024_3081_MOESM3_ESM.pdf]
